# Supplementary material for: Conservation systematics of the shield-backed trapdoor spiders of the nigrum-group (Mygalomorphae, Idiopidae, Idiosoma): integrative taxonomy reveals a diverse and threatened fauna from south-western Australia
Source: Zookeys. 2018 May 9;(756):1–121. doi: 10.3897/zookeys.756.24397 (PMC5956031; doi:10.3897/zookeys.756.24397)
Supplement: Supplementary material 5 — COI p-distances [file zookeys-756-001-s005.xlsx]

## Sheet: MatrixOutput
Pairwise distances (COI)
	58_T99997_M_ID_MYG_130_INCOMPTUM_Carnarvon_WA_{incomptum}	133_T99749_F_ID_MYG475_INTERMEDIUM_Koolyanobbing_WA_{intermedium}	NCB_010_T139519_M_ID_MYG475_INTERMEDIUM_Warrachuppin_WA_{intermedium}	310_T92079_J_ID_MYG475_INTERMEDIUM_Mt_Manning_WA_{intermedium}	NCB_005_T140940_F_ID_MYG475_INTERMEDIUM_Bullfinch_WA_{intermedium}	NCB_011_T139517_M_ID_MYG475_INTERMEDIUM_Mungarri_WA_{intermedium}	90_T131632_J_ID_MYG156_JARRAH_Arthur_Rv_WA_{jarrah}	131_T99952_M_ID_MYG156_JARRAH_Boddington_WA_{jarrah}	124_T124143_M_ID_MYG156_JARRAH_Lesmurdie_WA_{jarrah}	129_T40601_M_ID_MYG156_JARRAH_Mt_Helena_WA_{jarrah}	130_T40632_M_ID_MYG156_JARRAH_Stoneville_WA_{jarrah}	NCB_002_T136943_M_ID_MYG156_JARRAH_Bullsbrook_WA_{jarrah}	127_T55925_M_ID_SIGILLATUM_Curtin_Uni_WA_{sigillatum}	134_T129191_F_ID_SIGILLATUM_Karnup_WA_{sigillatum}	128_T46054_M_ID_SIGILLATUM_Dalyellup_WA_{sigillatum}	157_T123102_F_ID_SIGILLATUM_Leschenault_WA_{sigillatum}	ID_T132564_M_ID_SIGILLATUM_Crawley_WA_{sigillatum}	NCB_016_T132756_J_ID_SIGILLATUM_Shenton_Park_WA_{sigillatum}	NCB_001_T139469_F_ID_MYG474_MCCLEMENTSORUM_Julimar_WA_{mcclementsorum}	NCB_015_T139832_F_ID_MYG474_MCCLEMENTSORUM_7_Mile_Well_WA_{mcclementsorum}	152_T127017_F_ID_MYG477_DANDARAGAN_New_Norcia_WA_{dandaragan}	148_T108031_J_ID_MYG477_DANDARAGAN_Watheroo_WA_{dandaragan}	159_T125751_F_ID_MYG262_FORMOSUM_Mummaloo_WA_{formosum}	NCB_013_T125754_F_ID_MYG262_FORMOSUM_Mummaloo_WA_{formosum}	NCB_012_T139470_M_ID_MYG262_FORMOSUM_Mt_Gibson_WA_{formosum}	NCB_008_T139518_M_ID_MYG520_MCNAMARAI_Bruce_Rock_WA_{mcnamarai}	NCB_014_T139496_F_ID_MYG520_MCNAMARAI_Cleary_WA_{mcnamarai}	NCB_009_T26107_M_ID_MYG520_MCNAMARAI_Trayning_WA_{mcnamarai}	62_T132737_F_ID_NIGRUM_Minnivale_WA_{nigrum}	149_T122017_J_ID_NIGRUM_Wongan_Hills_WA_{nigrum}	150_T122018_J_ID_NIGRUM_Wongan_Hills_WA_{nigrum}	151_T122019_J_ID_NIGRUM_Wongan_Hills_WA_{nigrum}	NCB_020_T127020_F_ID_NIGRUM_Calingiri_WA_{nigrum}	154_T133465_F_ID_MYG518_SCHOKNECHTORUM_Meenaar_WA_{schoknechtorum}	NCB_004_T140765_F_ID_MYG518_SCHOKNECHTORUM_York_WA_{schoknechtorum}	63_T110576_F_ID_MYG018_CLYPEATUM_Yakabindie_WA_{clypeatum}	126_T96452_M_ID_MYG018_CLYPEATUM_Albion_Downs_WA_{clypeatum}	136_T110581_F_ID_MYG018_CLYPEATUM_Yakabindie_WA_{clypeatum}	135_T103475_F_ID_MYG018_CLYPEATUM_Yeelirrie_WA_{clypeatum}	160_T101942_F_ID_MYG018_CLYPEATUM_Yeelirrie_WA_{clypeatum}	64_T78246_F_ID_MYG018_CLYPEATUM_Coolcalalaya_WA_{clypeatum}	137_T78252_F_ID_MYG018_CLYPEATUM_Coolcalalaya_WA_{clypeatum}	138_T108032_F_ID_MYG018_CLYPEATUM_Woolgorong_WA_{clypeatum}	132_T107368_M_ID_MYG018_CLYPEATUM_Glen_Stn_WA_{clypeatum}	NCB_021_T136250_F_ID_MYG018_CLYPEATUM_Boolardy_Stn_WA_{clypeatum}	NCB_022_T136252_M_ID_MYG018_CLYPEATUM_Jack_Hills_WA_{clypeatum}	139_T108030_F_ID_MYG018_CLYPEATUM_Lakeside_Stn_WA_{clypeatum}	141_T108516_F_ID_MYG018_CLYPEATUM_Karara_WA_{clypeatum}	142_T110279_J_ID_MYG018_CLYPEATUM_Kadji_Kadji_WA_{clypeatum}
58_T99997_M_ID_MYG_130_INCOMPTUM_Carnarvon_WA_{incomptum}
133_T99749_F_ID_MYG475_INTERMEDIUM_Koolyanobbing_WA_{intermedium}	0.10775
NCB_010_T139519_M_ID_MYG475_INTERMEDIUM_Warrachuppin_WA_{intermedium}	0.10775	0.0434783
310_T92079_J_ID_MYG475_INTERMEDIUM_Mt_Manning_WA_{intermedium}	0.0964083	0.0586011	0.0567108
NCB_005_T140940_F_ID_MYG475_INTERMEDIUM_Bullfinch_WA_{intermedium}	0.100189	0.0642722	0.0623819	0.0226843
NCB_011_T139517_M_ID_MYG475_INTERMEDIUM_Mungarri_WA_{intermedium}	0.0850662	0.0775047	0.0756144	0.0680529	0.0680529
90_T131632_J_ID_MYG156_JARRAH_Arthur_Rv_WA_{jarrah}	0.141777	0.134216	0.137996	0.139887	0.137996	0.132325
131_T99952_M_ID_MYG156_JARRAH_Boddington_WA_{jarrah}	0.132325	0.126654	0.126654	0.128544	0.124764	0.134216	0.0510397
124_T124143_M_ID_MYG156_JARRAH_Lesmurdie_WA_{jarrah}	0.141777	0.124764	0.134216	0.126654	0.130435	0.134216	0.0718336	0.0699433
129_T40601_M_ID_MYG156_JARRAH_Mt_Helena_WA_{jarrah}	0.151229	0.137996	0.145558	0.130435	0.128544	0.137996	0.0793951	0.0718336	0.0321361
130_T40632_M_ID_MYG156_JARRAH_Stoneville_WA_{jarrah}	0.151229	0.137996	0.145558	0.130435	0.128544	0.137996	0.0793951	0.0718336	0.0321361	0
NCB_002_T136943_M_ID_MYG156_JARRAH_Bullsbrook_WA_{jarrah}	0.151229	0.137996	0.149338	0.136106	0.137996	0.136106	0.073724	0.0775047	0.0359168	0.0434783	0.0434783
127_T55925_M_ID_SIGILLATUM_Curtin_Uni_WA_{sigillatum}	0.128544	0.137996	0.137996	0.130435	0.134216	0.124764	0.100189	0.0982987	0.0982987	0.109641	0.109641	0.102079
134_T129191_F_ID_SIGILLATUM_Karnup_WA_{sigillatum}	0.134216	0.147448	0.136106	0.132325	0.136106	0.124764	0.10586	0.100189	0.10586	0.117202	0.117202	0.10775	0.0302457
128_T46054_M_ID_SIGILLATUM_Dalyellup_WA_{sigillatum}	0.128544	0.145558	0.137996	0.134216	0.139887	0.126654	0.10586	0.0982987	0.113422	0.124764	0.124764	0.109641	0.0567108	0.0434783
157_T123102_F_ID_SIGILLATUM_Leschenault_WA_{sigillatum}	0.126654	0.145558	0.137996	0.134216	0.139887	0.124764	0.102079	0.0982987	0.109641	0.120983	0.120983	0.10586	0.0491493	0.0359168	0.0151229
ID_T132564_M_ID_SIGILLATUM_Crawley_WA_{sigillatum}	0.126654	0.136106	0.134216	0.128544	0.134216	0.119093	0.102079	0.0982987	0.10586	0.111531	0.111531	0.10775	0.0548204	0.0434783	0.0586011	0.0548204
NCB_016_T132756_J_ID_SIGILLATUM_Shenton_Park_WA_{sigillatum}	0.130435	0.132325	0.137996	0.124764	0.130435	0.124764	0.10397	0.0964083	0.10586	0.109641	0.109641	0.10775	0.0510397	0.0510397	0.0604915	0.0567108	0.0170132
NCB_001_T139469_F_ID_MYG474_MCCLEMENTSORUM_Julimar_WA_{mcclementsorum}	0.120983	0.149338	0.132325	0.132325	0.139887	0.130435	0.0888469	0.0888469	0.10586	0.111531	0.111531	0.100189	0.0926276	0.0869565	0.0869565	0.0793951	0.0793951	0.0907372
NCB_015_T139832_F_ID_MYG474_MCCLEMENTSORUM_7_Mile_Well_WA_{mcclementsorum}	0.139887	0.162571	0.137996	0.141777	0.141777	0.134216	0.0793951	0.0812854	0.10586	0.111531	0.111531	0.100189	0.0888469	0.0907372	0.0888469	0.0850662	0.0907372	0.0982987	0.0321361
152_T127017_F_ID_MYG477_DANDARAGAN_New_Norcia_WA_{dandaragan}	0.134216	0.134216	0.130435	0.132325	0.132325	0.122873	0.0831758	0.0850662	0.10586	0.109641	0.109641	0.111531	0.0869565	0.0869565	0.10397	0.0964083	0.0756144	0.0756144	0.0831758	0.0926276
148_T108031_J_ID_MYG477_DANDARAGAN_Watheroo_WA_{dandaragan}	0.153119	0.141777	0.137996	0.134216	0.137996	0.128544	0.109641	0.10775	0.115312	0.113422	0.113422	0.117202	0.0964083	0.0982987	0.113422	0.10586	0.094518	0.0888469	0.10775	0.117202	0.0793951
159_T125751_F_ID_MYG262_FORMOSUM_Mummaloo_WA_{formosum}	0.132325	0.134216	0.130435	0.130435	0.132325	0.126654	0.117202	0.100189	0.124764	0.124764	0.124764	0.130435	0.094518	0.0907372	0.102079	0.094518	0.0869565	0.0907372	0.10586	0.115312	0.10397	0.10397
NCB_013_T125754_F_ID_MYG262_FORMOSUM_Mummaloo_WA_{formosum}	0.130435	0.139887	0.136106	0.136106	0.137996	0.132325	0.120983	0.10775	0.128544	0.130435	0.130435	0.136106	0.0907372	0.0888469	0.102079	0.094518	0.0869565	0.0907372	0.10586	0.111531	0.102079	0.10775	0.0113422
NCB_012_T139470_M_ID_MYG262_FORMOSUM_Mt_Gibson_WA_{formosum}	0.124764	0.134216	0.130435	0.130435	0.132325	0.120983	0.115312	0.10586	0.120983	0.124764	0.124764	0.130435	0.0888469	0.0850662	0.0926276	0.0850662	0.0850662	0.0888469	0.100189	0.109641	0.100189	0.100189	0.0170132	0.020794
NCB_008_T139518_M_ID_MYG520_MCNAMARAI_Bruce_Rock_WA_{mcnamarai}	0.115312	0.132325	0.128544	0.120983	0.124764	0.132325	0.113422	0.094518	0.128544	0.130435	0.130435	0.128544	0.10397	0.10775	0.10586	0.10586	0.0907372	0.0907372	0.100189	0.109641	0.117202	0.115312	0.102079	0.102079	0.100189
NCB_014_T139496_F_ID_MYG520_MCNAMARAI_Cleary_WA_{mcnamarai}	0.119093	0.126654	0.122873	0.122873	0.126654	0.10586	0.10775	0.102079	0.113422	0.117202	0.117202	0.120983	0.10397	0.094518	0.10775	0.100189	0.0888469	0.094518	0.111531	0.119093	0.10397	0.0964083	0.0982987	0.102079	0.0964083	0.0812854
NCB_009_T26107_M_ID_MYG520_MCNAMARAI_Trayning_WA_{mcnamarai}	0.136106	0.139887	0.141777	0.130435	0.130435	0.126654	0.102079	0.0926276	0.102079	0.10775	0.10775	0.113422	0.102079	0.109641	0.117202	0.10775	0.102079	0.0964083	0.10775	0.109641	0.102079	0.111531	0.10586	0.111531	0.10775	0.0964083	0.0888469
62_T132737_F_ID_NIGRUM_Minnivale_WA_{nigrum}	0.151229	0.149338	0.141777	0.147448	0.153119	0.130435	0.111531	0.115312	0.120983	0.124764	0.124764	0.124764	0.113422	0.117202	0.126654	0.119093	0.120983	0.122873	0.120983	0.115312	0.10586	0.111531	0.113422	0.115312	0.109641	0.119093	0.0964083	0.117202
149_T122017_J_ID_NIGRUM_Wongan_Hills_WA_{nigrum}	0.136106	0.132325	0.137996	0.141777	0.139887	0.126654	0.117202	0.122873	0.113422	0.126654	0.126654	0.119093	0.100189	0.10586	0.111531	0.10397	0.0907372	0.094518	0.109641	0.119093	0.102079	0.117202	0.10775	0.109641	0.10397	0.102079	0.0926276	0.0964083	0.100189
150_T122018_J_ID_NIGRUM_Wongan_Hills_WA_{nigrum}	0.136106	0.132325	0.137996	0.145558	0.143667	0.130435	0.113422	0.119093	0.109641	0.122873	0.122873	0.119093	0.100189	0.10586	0.111531	0.10397	0.0907372	0.094518	0.10775	0.117202	0.100189	0.113422	0.10775	0.109641	0.10397	0.102079	0.0926276	0.0964083	0.100189	0.00378072
151_T122019_J_ID_NIGRUM_Wongan_Hills_WA_{nigrum}	0.130435	0.149338	0.147448	0.141777	0.137996	0.128544	0.115312	0.115312	0.111531	0.119093	0.119093	0.117202	0.0926276	0.0907372	0.10397	0.0964083	0.0888469	0.0888469	0.100189	0.10397	0.102079	0.113422	0.113422	0.117202	0.109641	0.0964083	0.0888469	0.10397	0.0926276	0.0529301	0.0491493
NCB_020_T127020_F_ID_NIGRUM_Calingiri_WA_{nigrum}	0.141777	0.151229	0.147448	0.147448	0.141777	0.128544	0.115312	0.113422	0.122873	0.130435	0.130435	0.130435	0.111531	0.109641	0.120983	0.120983	0.102079	0.10775	0.10397	0.100189	0.102079	0.122873	0.122873	0.124764	0.126654	0.111531	0.100189	0.100189	0.10586	0.0604915	0.0567108	0.0415879
154_T133465_F_ID_MYG518_SCHOKNECHTORUM_Meenaar_WA_{schoknechtorum}	0.149338	0.149338	0.147448	0.149338	0.145558	0.141777	0.128544	0.120983	0.128544	0.132325	0.132325	0.130435	0.120983	0.122873	0.124764	0.122873	0.10775	0.109641	0.128544	0.137996	0.10397	0.10586	0.109641	0.111531	0.109641	0.115312	0.0964083	0.102079	0.117202	0.0888469	0.0888469	0.10397	0.109641
NCB_004_T140765_F_ID_MYG518_SCHOKNECHTORUM_York_WA_{schoknechtorum}	0.139887	0.141777	0.136106	0.134216	0.134216	0.124764	0.132325	0.120983	0.122873	0.126654	0.126654	0.137996	0.111531	0.109641	0.126654	0.120983	0.10586	0.109641	0.124764	0.130435	0.0982987	0.094518	0.113422	0.111531	0.10586	0.117202	0.0907372	0.10397	0.109641	0.0926276	0.0926276	0.0964083	0.10775	0.0340265
63_T110576_F_ID_MYG018_CLYPEATUM_Yakabindie_WA_{clypeatum}	0.137996	0.136106	0.126654	0.134216	0.137996	0.124764	0.126654	0.111531	0.128544	0.137996	0.137996	0.139887	0.111531	0.102079	0.119093	0.115312	0.117202	0.113422	0.119093	0.119093	0.113422	0.109641	0.102079	0.100189	0.0982987	0.120983	0.109641	0.130435	0.113422	0.117202	0.117202	0.120983	0.122873	0.126654	0.109641
126_T96452_M_ID_MYG018_CLYPEATUM_Albion_Downs_WA_{clypeatum}	0.136106	0.137996	0.128544	0.136106	0.139887	0.122873	0.124764	0.109641	0.126654	0.136106	0.136106	0.137996	0.111531	0.102079	0.119093	0.115312	0.115312	0.115312	0.117202	0.117202	0.111531	0.111531	0.0982987	0.0964083	0.094518	0.119093	0.10775	0.128544	0.111531	0.115312	0.115312	0.119093	0.120983	0.124764	0.10775	0.00378072
136_T110581_F_ID_MYG018_CLYPEATUM_Yakabindie_WA_{clypeatum}	0.134216	0.136106	0.130435	0.134216	0.137996	0.128544	0.126654	0.111531	0.128544	0.137996	0.137996	0.139887	0.111531	0.10586	0.122873	0.119093	0.120983	0.113422	0.122873	0.122873	0.113422	0.113422	0.10586	0.10397	0.102079	0.124764	0.113422	0.130435	0.117202	0.120983	0.120983	0.124764	0.126654	0.130435	0.113422	0.00378072	0.00756144
135_T103475_F_ID_MYG018_CLYPEATUM_Yeelirrie_WA_{clypeatum}	0.141777	0.139887	0.130435	0.137996	0.137996	0.126654	0.128544	0.113422	0.128544	0.137996	0.137996	0.136106	0.113422	0.102079	0.119093	0.115312	0.119093	0.115312	0.117202	0.117202	0.113422	0.111531	0.102079	0.100189	0.094518	0.120983	0.111531	0.132325	0.111531	0.111531	0.111531	0.115312	0.117202	0.120983	0.10775	0.0094518	0.0094518	0.0132325
160_T101942_F_ID_MYG018_CLYPEATUM_Yeelirrie_WA_{clypeatum}	0.147448	0.143667	0.137996	0.141777	0.147448	0.132325	0.136106	0.124764	0.137996	0.147448	0.147448	0.149338	0.120983	0.111531	0.132325	0.128544	0.124764	0.120983	0.126654	0.126654	0.122873	0.115312	0.111531	0.109641	0.10775	0.132325	0.113422	0.136106	0.120983	0.120983	0.120983	0.128544	0.126654	0.132325	0.119093	0.0226843	0.0226843	0.026465	0.026465
64_T78246_F_ID_MYG018_CLYPEATUM_Coolcalalaya_WA_{clypeatum}	0.134216	0.136106	0.132325	0.120983	0.122873	0.120983	0.117202	0.115312	0.122873	0.128544	0.128544	0.130435	0.100189	0.10586	0.124764	0.120983	0.113422	0.10586	0.111531	0.113422	0.10586	0.094518	0.10397	0.109641	0.0982987	0.113422	0.10397	0.122873	0.119093	0.111531	0.111531	0.111531	0.109641	0.122873	0.117202	0.0529301	0.0567108	0.0529301	0.0529301	0.0642722
137_T78252_F_ID_MYG018_CLYPEATUM_Coolcalalaya_WA_{clypeatum}	0.136106	0.137996	0.134216	0.122873	0.119093	0.120983	0.117202	0.111531	0.122873	0.124764	0.124764	0.132325	0.0982987	0.10397	0.122873	0.119093	0.111531	0.10397	0.111531	0.111531	0.102079	0.094518	0.102079	0.10775	0.0964083	0.113422	0.10397	0.120983	0.119093	0.111531	0.111531	0.109641	0.10775	0.120983	0.115312	0.0548204	0.0586011	0.0548204	0.0548204	0.0661626	0.00378072
138_T108032_F_ID_MYG018_CLYPEATUM_Woolgorong_WA_{clypeatum}	0.124764	0.145558	0.137996	0.124764	0.134216	0.122873	0.109641	0.10775	0.119093	0.124764	0.124764	0.130435	0.0850662	0.0812854	0.10775	0.100189	0.10397	0.0964083	0.0964083	0.10586	0.0907372	0.0888469	0.0964083	0.0982987	0.0926276	0.109641	0.100189	0.109641	0.10397	0.111531	0.10775	0.100189	0.10397	0.109641	0.0982987	0.0491493	0.0529301	0.0491493	0.0491493	0.0642722	0.0378072	0.0415879
132_T107368_M_ID_MYG018_CLYPEATUM_Glen_Stn_WA_{clypeatum}	0.126654	0.143667	0.130435	0.128544	0.124764	0.119093	0.122873	0.115312	0.126654	0.128544	0.128544	0.139887	0.0926276	0.0831758	0.10586	0.10586	0.100189	0.0964083	0.115312	0.120983	0.0907372	0.0907372	0.0982987	0.0964083	0.0907372	0.115312	0.100189	0.126654	0.117202	0.124764	0.120983	0.10775	0.115312	0.111531	0.0964083	0.0586011	0.0586011	0.0623819	0.0586011	0.0699433	0.0529301	0.0510397	0.0434783
NCB_021_T136250_F_ID_MYG018_CLYPEATUM_Boolardy_Stn_WA_{clypeatum}	0.124764	0.143667	0.128544	0.126654	0.126654	0.119093	0.120983	0.113422	0.120983	0.124764	0.124764	0.136106	0.0982987	0.0926276	0.111531	0.111531	0.10397	0.100189	0.10775	0.113422	0.0907372	0.0907372	0.0982987	0.0964083	0.0907372	0.113422	0.10586	0.124764	0.120983	0.119093	0.115312	0.10775	0.117202	0.113422	0.0982987	0.0529301	0.0567108	0.0567108	0.0567108	0.0718336	0.0491493	0.0491493	0.0396975	0.0245747
NCB_022_T136252_M_ID_MYG018_CLYPEATUM_Jack_Hills_WA_{clypeatum}	0.124764	0.143667	0.128544	0.126654	0.126654	0.119093	0.120983	0.113422	0.120983	0.124764	0.124764	0.136106	0.0982987	0.0926276	0.111531	0.111531	0.10397	0.100189	0.10775	0.113422	0.0907372	0.0907372	0.0982987	0.0964083	0.0907372	0.113422	0.10586	0.124764	0.120983	0.119093	0.115312	0.10775	0.117202	0.113422	0.0982987	0.0529301	0.0567108	0.0567108	0.0567108	0.0718336	0.0491493	0.0491493	0.0396975	0.0245747	0
139_T108030_F_ID_MYG018_CLYPEATUM_Lakeside_Stn_WA_{clypeatum}	0.136106	0.143667	0.139887	0.137996	0.130435	0.122873	0.115312	0.113422	0.119093	0.120983	0.120983	0.136106	0.10397	0.100189	0.124764	0.120983	0.10586	0.102079	0.120983	0.120983	0.100189	0.102079	0.100189	0.0982987	0.0926276	0.124764	0.10397	0.120983	0.124764	0.117202	0.113422	0.113422	0.119093	0.115312	0.0982987	0.0661626	0.0661626	0.0661626	0.0661626	0.0812854	0.0604915	0.0604915	0.047259	0.047259	0.0396975	0.0396975
141_T108516_F_ID_MYG018_CLYPEATUM_Karara_WA_{clypeatum}	0.120983	0.141777	0.132325	0.132325	0.139887	0.124764	0.122873	0.119093	0.122873	0.132325	0.132325	0.136106	0.10397	0.0982987	0.113422	0.109641	0.100189	0.100189	0.10397	0.117202	0.10586	0.10397	0.109641	0.10775	0.10397	0.10397	0.094518	0.120983	0.120983	0.109641	0.10586	0.10586	0.113422	0.102079	0.100189	0.0680529	0.0680529	0.0718336	0.0699433	0.0793951	0.0680529	0.0718336	0.047259	0.0567108	0.0491493	0.0491493	0.0642722
142_T110279_J_ID_MYG018_CLYPEATUM_Kadji_Kadji_WA_{clypeatum}	0.143667	0.139887	0.132325	0.128544	0.126654	0.130435	0.122873	0.109641	0.132325	0.134216	0.134216	0.139887	0.117202	0.115312	0.124764	0.124764	0.113422	0.10586	0.10775	0.111531	0.10586	0.10397	0.109641	0.111531	0.115312	0.111531	0.119093	0.128544	0.124764	0.124764	0.120983	0.128544	0.115312	0.115312	0.111531	0.0718336	0.0756144	0.0718336	0.0699433	0.0831758	0.0661626	0.0699433	0.0586011	0.0642722	0.0567108	0.0567108	0.0699433	0.0567108
140_T108517_F_ID_MYG018_CLYPEATUM_Dalgaranga_Stn_WA_{clypeatum}	0.143667	0.139887	0.137996	0.132325	0.136106	0.134216	0.109641	0.10397	0.111531	0.120983	0.120983	0.124764	0.100189	0.0964083	0.10586	0.10586	0.10586	0.0982987	0.113422	0.120983	0.0982987	0.094518	0.102079	0.102079	0.0982987	0.109641	0.10586	0.113422	0.117202	0.119093	0.115312	0.100189	0.113422	0.111531	0.102079	0.0642722	0.0604915	0.0642722	0.0642722	0.0718336	0.0623819	0.0623819	0.0548204	0.0567108	0.0548204	0.0548204	0.0661626	0.0699433	0.073724
125_T117996_F_ID_MYG018_CLYPEATUM_Blue_Hill_Rg_WA_{clypeatum}	0.128544	0.120983	0.117202	0.117202	0.126654	0.115312	0.115312	0.117202	0.122873	0.126654	0.126654	0.136106	0.102079	0.102079	0.113422	0.109641	0.100189	0.0926276	0.113422	0.124764	0.0926276	0.094518	0.0964083	0.0982987	0.0907372	0.117202	0.10586	0.122873	0.120983	0.120983	0.120983	0.111531	0.120983	0.120983	0.109641	0.0680529	0.0718336	0.0680529	0.0699433	0.0869565	0.0567108	0.0604915	0.0567108	0.0567108	0.0529301	0.0529301	0.0567108	0.0529301	0.0642722
143_T125765_F_ID_MYG521_KOPEJTKAORUM_Mummaloo_WA_{kopejtkaorum}	0.136106	0.141777	0.139887	0.137996	0.136106	0.119093	0.117202	0.117202	0.124764	0.128544	0.128544	0.137996	0.113422	0.10775	0.122873	0.117202	0.109641	0.109641	0.119093	0.117202	0.10397	0.124764	0.115312	0.113422	0.10397	0.124764	0.102079	0.126654	0.117202	0.119093	0.119093	0.115312	0.120983	0.119093	0.10775	0.0699433	0.0699433	0.0699433	0.0699433	0.0850662	0.0718336	0.0718336	0.0623819	0.0775047	0.073724	0.073724	0.0604915	0.0850662	0.0907372
NCB_003_T140751_F_ID_MYG521_KOPEJTKAORUM_Charles_Darwin_NR_WA_{kopejtkaorum}	0.136106	0.139887	0.136106	0.130435	0.128544	0.120983	0.117202	0.10586	0.122873	0.122873	0.122873	0.139887	0.10586	0.102079	0.117202	0.111531	0.113422	0.10586	0.113422	0.111531	0.102079	0.10586	0.109641	0.10775	0.0982987	0.115312	0.0907372	0.117202	0.109641	0.119093	0.119093	0.117202	0.119093	0.115312	0.102079	0.0642722	0.0642722	0.0642722	0.0604915	0.073724	0.0623819	0.0586011	0.0548204	0.0604915	0.0604915	0.0604915	0.0567108	0.0793951	0.073724
144_T108519_F_ID_MYG521_KOPEJTKAORUM_Charles_Darwin_NR_WA_{kopejtkaorum}	0.134216	0.151229	0.149338	0.143667	0.145558	0.124764	0.115312	0.115312	0.126654	0.132325	0.132325	0.141777	0.10586	0.10775	0.120983	0.115312	0.109641	0.10586	0.117202	0.113422	0.10586	0.111531	0.119093	0.113422	0.10775	0.126654	0.0982987	0.117202	0.124764	0.122873	0.119093	0.120983	0.117202	0.122873	0.109641	0.0699433	0.0661626	0.0699433	0.0680529	0.0812854	0.0642722	0.0642722	0.0586011	0.0718336	0.0718336	0.0718336	0.0586011	0.073724	0.0831758
NCB_019_T126455_F_ID_MYG521_KOPEJTKAORUM_Mummaloo_WA_{kopejtkaorum}	0.130435	0.151229	0.149338	0.145558	0.145558	0.124764	0.113422	0.113422	0.124764	0.130435	0.130435	0.139887	0.10586	0.10397	0.119093	0.113422	0.10775	0.10397	0.113422	0.113422	0.10397	0.109641	0.117202	0.111531	0.10586	0.124764	0.094518	0.115312	0.120983	0.120983	0.117202	0.119093	0.113422	0.120983	0.10775	0.0680529	0.0642722	0.0680529	0.0661626	0.0793951	0.0661626	0.0661626	0.0529301	0.0661626	0.0699433	0.0699433	0.0567108	0.0680529	0.0812854
145_T108523_F_ID_MYG521_KOPEJTKAORUM_Maya_NR_WA_{kopejtkaorum}	0.132325	0.136106	0.130435	0.132325	0.136106	0.124764	0.128544	0.119093	0.132325	0.136106	0.136106	0.147448	0.113422	0.111531	0.115312	0.120983	0.115312	0.111531	0.124764	0.124764	0.10586	0.10586	0.10775	0.109641	0.102079	0.113422	0.10586	0.117202	0.115312	0.120983	0.120983	0.120983	0.120983	0.111531	0.102079	0.0699433	0.0661626	0.0699433	0.0699433	0.0812854	0.0623819	0.0661626	0.0604915	0.0623819	0.0604915	0.0604915	0.0642722	0.0680529	0.0775047
147_T108518_J_ID_MYG521_KOPEJTKAORUM_Buntine_NR_WA_{kopejtkaorum}	0.143667	0.137996	0.137996	0.141777	0.141777	0.130435	0.124764	0.119093	0.128544	0.128544	0.128544	0.141777	0.102079	0.109641	0.119093	0.120983	0.10586	0.102079	0.126654	0.120983	0.10586	0.10397	0.10775	0.111531	0.10586	0.117202	0.0964083	0.120983	0.113422	0.109641	0.10586	0.111531	0.115312	0.122873	0.111531	0.0812854	0.0775047	0.0812854	0.0775047	0.0888469	0.0680529	0.0680529	0.0699433	0.0756144	0.0775047	0.0775047	0.0699433	0.0850662	0.0888469
NCB_007_T139468_M_ID_MYG472_KWONGAN_Mt_Lesueur_WA_{kwongan}	0.139887	0.153119	0.143667	0.139887	0.137996	0.122873	0.128544	0.120983	0.128544	0.128544	0.128544	0.136106	0.0964083	0.0926276	0.10775	0.10397	0.0964083	0.100189	0.117202	0.124764	0.102079	0.094518	0.0926276	0.0982987	0.0888469	0.120983	0.102079	0.124764	0.122873	0.119093	0.119093	0.119093	0.120983	0.117202	0.111531	0.0907372	0.094518	0.094518	0.0926276	0.10586	0.0699433	0.0661626	0.0642722	0.0642722	0.0661626	0.0661626	0.0699433	0.0831758	0.0907372
NCB_018_T27117_M_ID_MYG472_KWONGAN_Eneabba_WA_{kwongan}	0.149338	0.162571	0.149338	0.153119	0.1569	0.139887	0.137996	0.128544	0.126654	0.139887	0.139887	0.141777	0.109641	0.10397	0.117202	0.117202	0.113422	0.113422	0.122873	0.117202	0.10775	0.10397	0.109641	0.10397	0.0982987	0.134216	0.10775	0.128544	0.130435	0.120983	0.120983	0.128544	0.136106	0.124764	0.120983	0.094518	0.0982987	0.0982987	0.0964083	0.102079	0.0831758	0.0812854	0.0756144	0.0775047	0.0756144	0.0756144	0.0869565	0.0888469	0.109641
NCB_006_T141118_F_ID_MYG478_ARENACEUM_Kalbarri_WA_{arenaceum}	0.124764	0.145558	0.141777	0.136106	0.137996	0.126654	0.122873	0.117202	0.119093	0.124764	0.124764	0.134216	0.102079	0.100189	0.111531	0.10775	0.10775	0.102079	0.113422	0.117202	0.102079	0.109641	0.10586	0.10397	0.0982987	0.10586	0.0907372	0.117202	0.117202	0.119093	0.115312	0.109641	0.120983	0.128544	0.122873	0.0831758	0.0831758	0.0831758	0.0850662	0.094518	0.073724	0.0718336	0.0623819	0.0661626	0.0680529	0.0680529	0.0756144	0.0775047	0.0888469
NCB_017_T41364_M_ID_MYG478_ARENACEUM_Zuytdorp_WA_{arenaceum}	0.139887	0.143667	0.134216	0.132325	0.132325	0.130435	0.102079	0.111531	0.122873	0.130435	0.130435	0.134216	0.0907372	0.0850662	0.10586	0.0982987	0.094518	0.0850662	0.100189	0.0964083	0.0831758	0.0926276	0.10586	0.10397	0.0926276	0.111531	0.094518	0.109641	0.113422	0.111531	0.109641	0.10397	0.115312	0.120983	0.111531	0.0831758	0.0869565	0.0831758	0.0850662	0.0964083	0.0718336	0.0699433	0.0642722	0.0680529	0.073724	0.073724	0.0756144	0.0756144	0.0907372
	58_T99997_M_ID_MYG_130_INCOMPTUM_Carnarvon_WA_{incomptum}	133_T99749_F_ID_MYG475_INTERMEDIUM_Koolyanobbing_WA_{intermedium}	NCB_010_T139519_M_ID_MYG475_INTERMEDIUM_Warrachuppin_WA_{intermedium}	310_T92079_J_ID_MYG475_INTERMEDIUM_Mt_Manning_WA_{intermedium}	NCB_005_T140940_F_ID_MYG475_INTERMEDIUM_Bullfinch_WA_{intermedium}	NCB_011_T139517_M_ID_MYG475_INTERMEDIUM_Mungarri_WA_{intermedium}	90_T131632_J_ID_MYG156_JARRAH_Arthur_Rv_WA_{jarrah}	131_T99952_M_ID_MYG156_JARRAH_Boddington_WA_{jarrah}	124_T124143_M_ID_MYG156_JARRAH_Lesmurdie_WA_{jarrah}	129_T40601_M_ID_MYG156_JARRAH_Mt_Helena_WA_{jarrah}	130_T40632_M_ID_MYG156_JARRAH_Stoneville_WA_{jarrah}	NCB_002_T136943_M_ID_MYG156_JARRAH_Bullsbrook_WA_{jarrah}	127_T55925_M_ID_SIGILLATUM_Curtin_Uni_WA_{sigillatum}	134_T129191_F_ID_SIGILLATUM_Karnup_WA_{sigillatum}	128_T46054_M_ID_SIGILLATUM_Dalyellup_WA_{sigillatum}	157_T123102_F_ID_SIGILLATUM_Leschenault_WA_{sigillatum}	ID_T132564_M_ID_SIGILLATUM_Crawley_WA_{sigillatum}	NCB_016_T132756_J_ID_SIGILLATUM_Shenton_Park_WA_{sigillatum}	NCB_001_T139469_F_ID_MYG474_MCCLEMENTSORUM_Julimar_WA_{mcclementsorum}	NCB_015_T139832_F_ID_MYG474_MCCLEMENTSORUM_7_Mile_Well_WA_{mcclementsorum}	152_T127017_F_ID_MYG477_DANDARAGAN_New_Norcia_WA_{dandaragan}	148_T108031_J_ID_MYG477_DANDARAGAN_Watheroo_WA_{dandaragan}	159_T125751_F_ID_MYG262_FORMOSUM_Mummaloo_WA_{formosum}	NCB_013_T125754_F_ID_MYG262_FORMOSUM_Mummaloo_WA_{formosum}	NCB_012_T139470_M_ID_MYG262_FORMOSUM_Mt_Gibson_WA_{formosum}	NCB_008_T139518_M_ID_MYG520_MCNAMARAI_Bruce_Rock_WA_{mcnamarai}	NCB_014_T139496_F_ID_MYG520_MCNAMARAI_Cleary_WA_{mcnamarai}	NCB_009_T26107_M_ID_MYG520_MCNAMARAI_Trayning_WA_{mcnamarai}	62_T132737_F_ID_NIGRUM_Minnivale_WA_{nigrum}	149_T122017_J_ID_NIGRUM_Wongan_Hills_WA_{nigrum}	150_T122018_J_ID_NIGRUM_Wongan_Hills_WA_{nigrum}	151_T122019_J_ID_NIGRUM_Wongan_Hills_WA_{nigrum}	NCB_020_T127020_F_ID_NIGRUM_Calingiri_WA_{nigrum}	154_T133465_F_ID_MYG518_SCHOKNECHTORUM_Meenaar_WA_{schoknechtorum}	NCB_004_T140765_F_ID_MYG518_SCHOKNECHTORUM_York_WA_{schoknechtorum}	63_T110576_F_ID_MYG018_CLYPEATUM_Yakabindie_WA_{clypeatum}	126_T96452_M_ID_MYG018_CLYPEATUM_Albion_Downs_WA_{clypeatum}	136_T110581_F_ID_MYG018_CLYPEATUM_Yakabindie_WA_{clypeatum}	135_T103475_F_ID_MYG018_CLYPEATUM_Yeelirrie_WA_{clypeatum}	160_T101942_F_ID_MYG018_CLYPEATUM_Yeelirrie_WA_{clypeatum}	64_T78246_F_ID_MYG018_CLYPEATUM_Coolcalalaya_WA_{clypeatum}	137_T78252_F_ID_MYG018_CLYPEATUM_Coolcalalaya_WA_{clypeatum}	138_T108032_F_ID_MYG018_CLYPEATUM_Woolgorong_WA_{clypeatum}	132_T107368_M_ID_MYG018_CLYPEATUM_Glen_Stn_WA_{clypeatum}	NCB_021_T136250_F_ID_MYG018_CLYPEATUM_Boolardy_Stn_WA_{clypeatum}	NCB_022_T136252_M_ID_MYG018_CLYPEATUM_Jack_Hills_WA_{clypeatum}	139_T108030_F_ID_MYG018_CLYPEATUM_Lakeside_Stn_WA_{clypeatum}	141_T108516_F_ID_MYG018_CLYPEATUM_Karara_WA_{clypeatum}	142_T110279_J_ID_MYG018_CLYPEATUM_Kadji_Kadji_WA_{clypeatum}
[truncated: 27 more columns]

## Sheet: Caption
Table. Estimates of Evolutionary Divergence between Sequences
The number of base differences per site from between sequences are shown. The analysis involved 61 nucleotide sequences. Codon positions included were 1st+2nd+3rd+Noncoding. All positions containing gaps and missing data were eliminated. There were a total of 529 positions in the final dataset. Evolutionary analyses were conducted in MEGA6 [1].
1. Tamura K., Stecher G., Peterson D., Filipski A., and Kumar S. (2013). MEGA6: Molecular Evolutionary Genetics Analysis version 6.0. Molecular Biology and Evolution30: 2725-2729.
Disclaimer: Although utmost care has been taken to ensure the correctness of the caption, the caption text is provided "as is" without any warranty of any kind. Authors advise the user to carefully check the caption prior to its use for any purpose and report any errors or problems to the authors immediately (www.megasoftware.net). In no event shall the authors and their employers be liable for a…
